# Supplementary material for: Facile fabrication of ultrathin graphene film with ultrahigh electrical conductivity and superb electromagnetic interference shielding effectiveness
Source: Royal Society of Chemistry journal article supplement (doi:10.1039/d0tc04576d), 2020-11-19
Supplement: d0tc04576d1.pdf [file d0tc04576d1.pdf]

# **Facile fabrication of ultrathin graphene film with ultrahigh electrical conductivity and superb electromagnetic interference shielding effectiveness**

Xiaojing Liu, Wenyu Wu, Bin Guo, Minghao Cui, Huaxin Ma, Zhao Zhang and Ruijun Zhang\*

State Key Laboratory of Metastable Materials Science and Technology, Yanshan University, Qinhuangdao 066004, China.

\*Corresponding author: Ruijun Zhang.

Tel: +86 335 8074631.

E-mail address: zhangrj@ysu.edu.cn (R. Zhang).

### ● A brief description on the measurement method for the film thickness

In order to obtain the accurate result of film thickness, the following measurement procedures has been used:

Firstly, the as-prepared graphene film was cut into a small slice with a dimension of  $1 \times 0.5 \text{ cm}^2$ , and then fixed vertically on the sample stage with conductive adhesive for the SEM observation (schematically shown in Fig. 1).

Then, the film thickness measurement was performed under SEM observation. During which, the position of the sample stage was carefully and continuously adjusted to control the angle between the electron beam and the cross section of the film sample. Once the electron beam was perpendicular to the cross section (schematically shown in Fig. 1), the position adjustment of the sample stage was finished, and the cross-sectional morphological image was taken at this moment. Eventually, the film thickness was obtained by carefully measuring the width of the cross section on the resultant SEM image. For accuracy, the value of film thickness was determined by averaging the measurement data obtained from 5 different cross-section positions.

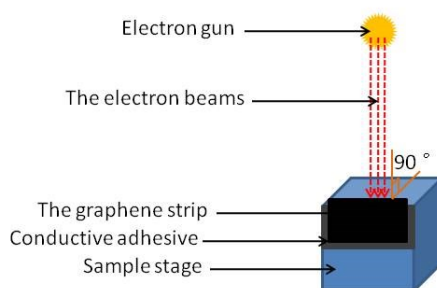

Fig. 1 The schematic diagram of SEM measuring film thickness.

- [1] W. X. Yang, Y. C. Gong, X. F. Zhao, T. Y. Liu, Y. Y. Zhang, F. Chen, Q. Fu, *ACS Sustainable Chem. Eng.*, 2019, **7**, 5045-5056.
- [2] X. L. Zhao, W. Q. Yao, W. W. Gao, H. Chen, C. Ga, *Adv. Mater.*, 2017, **29**, 1701482.
- [3] P. Kumar, *Adv. Mater. Interfaces*, 2019, **6**, 1901454.
